# Supplementary material
Source: HighWire-hosted journal article supplement (https://bmjopen.bmj.com/content/8/2/e019698)
Supplement: inline-supplementary-material-2 [file inline-supplementary-material-2.pdf]

## Supplemental files

**Table S1. Description of CHERRY study data sources and dataset codes**

| <b>Research databases</b> | <b>Data sources</b>                  | <b>Dataset codes</b>  | <b>Description</b>                             |
|---------------------------|--------------------------------------|-----------------------|------------------------------------------------|
| Socio-demographics        | Registered health insurance database | KTBASE_PERSON         | Registered person insurance records            |
|                           |                                      | KTBASE_CARD           | Registered person insurance card information   |
|                           |                                      | KTHRA_HEALTH_ARCHIVES | Registered person health records               |
|                           |                                      | KTHRA_HEALTH_AIDINFO  | Registered person supplementary health records |
|                           |                                      | KTHRA_PRACTICE        | Life-style risk factors information records    |
|                           |                                      | KTHRA_FAMILY_HISTORY  | Family history records                         |
|                           |                                      | KTHRA_DIAGNOSES       | Disease history records                        |
|                           | Population census database           | KTHRA_HOME            | Registered household records                   |
|                           |                                      | KTHRA_HOME_PROBLEMS   | Major household information records            |

---

|                                                          |                                                                         |                        |                                              |
|----------------------------------------------------------|-------------------------------------------------------------------------|------------------------|----------------------------------------------|
| Longitudinal measurements on cardiovascular risk factors | Health checks for New Rural Cooperative Medical Scheme (NRCMS) database | KTPEIS_S401_1          | Health checks records                        |
|                                                          |                                                                         | KTPEIS_S401_2          | Detailed health checks records               |
|                                                          |                                                                         | KTPEIS_S401_3          | Health checks summary                        |
|                                                          |                                                                         | KTPEIS_MAN_CHECK       | Adult health checks registration information |
|                                                          |                                                                         | KTPEIS_MAN_LIFESTYLE   | Adult life-style information records         |
|                                                          |                                                                         | KTPEIS_MAN_CHECKHEALTH | Adult physical examination records           |
|                                                          |                                                                         | KTPEIS_MAN_AIDCHECK    | Adult laboratory testing records             |
|                                                          |                                                                         | KTPEIS_MAN_MAINPROBLEM | Adult major health problem records           |
|                                                          |                                                                         | KTPEIS_MAN_INHOS       | Adult inpatient hospital admission records   |
|                                                          |                                                                         | KTPEIS_MAN_MAIN_DRUG   | Adult current medication information         |
| KTPEIS_MAN_ASSESSMENT                                    | Adult health assessment information                                     |                        |                                              |

---

---

|                                                     |                          |                                                          |
|-----------------------------------------------------|--------------------------|----------------------------------------------------------|
| Health checks for elderly people database           | KTHRA_ELDER_VISITS       | Elderly people follow-up records                         |
|                                                     | KTHRA_ELDER_ARCHIVES     | Elderly people health assessment information             |
| Health checks for adults with hypertension database | KTCDCMS_CARD             | Adults with hypertension registration information        |
|                                                     | KTCDCMS_HT_CARD          | Detailed information on adults with hypertension records |
|                                                     | KTCDCMS_HT_CARD_CHECK    | Health checks records for adults with hypertension       |
|                                                     | KTCDCMS_HT_VISITS        | Follow-up records for adults with hypertension           |
|                                                     | KTCDCMS_HT_VISITS_DETAIL | Detailed follow-up records for adults with hypertension  |
|                                                     | KTCDCMS_HT_MEDIDETAIL    | Medication records for adults with hypertension          |
| Health checks for adults with diabetes database     | KTCDCMS_HT_YEAREVAL      | Annual health assessment for adults with hypertension    |
|                                                     | KTCDCMS_CARD             | Adults with diabetes registration information            |
|                                                     | KTCDCMS_DM_CARD          | Detailed information on adults with diabetes records     |

---

---

|                                       |                          |                                                            |
|---------------------------------------|--------------------------|------------------------------------------------------------|
|                                       | KTCDCMS_DM_VISITS        | Follow-up records for adults with diabetes                 |
|                                       | KTCDCMS_DM_VISITS_DETAIL | Detailed follow-up records for adults with diabetes        |
|                                       | KTCDCMS_DM_MEDIDETAIl    | Medication records for adults with diabetes                |
|                                       | KTCDCMS_DM_YEAREVAL      | Annual health assessment for adults with diabetes          |
| Cardiovascular high-risk population   | KTCDCMS_HIGHRISK_CARD    | Cardiovascular high-risk person registration chart         |
|                                       | KTCDCMS_HIGHRISK_VISITS  | Cardiovascular high-risk person follow-up records          |
|                                       | KTCDCMS_HIGHRISK_DETAIL  | Detailed cardiovascular high-risk person follow-up records |
| Clinical examination records database | KTEXAMINE_REPORT_INFO    | Clinical examination and imaging information records       |
| Clinical laboratory testing database  | KTASSAY_REPORT_INFO      | Laboratory testing records                                 |
|                                       | KTASSAY_REPORT_DETAIL    | Detailed laboratory testing records                        |

---

---

|                                      |                                     |                         |                                                   |
|--------------------------------------|-------------------------------------|-------------------------|---------------------------------------------------|
| Health care services and medications | Outpatient medical records database | KTOUT_REGINFO           | Outpatient registration information records       |
|                                      |                                     | KTDOC_DIAGNOSE          | Outpatient diagnosis records                      |
|                                      | Outpatient prescription database    | KTDOC_PRESCRIPTION      | Outpatient prescription records                   |
|                                      |                                     | KTDOC_PRESCRIPTION_LIST | Detailed outpatient prescription records          |
|                                      |                                     | KTDOC_EXPENSES          | Outpatient treatment expenses records             |
|                                      | Outpatient charge database          | KTOUT_CHARGE            | Outpatient charge records                         |
|                                      |                                     | KTOUT_CHARGEDETAIL      | Detailed outpatient charge records                |
| Inpatient medical records database   |                                     | KTINHOS_REGISTER        | Inpatient registration information records        |
|                                      |                                     | KTINHOS_PATIENT_HOME    | Inpatient medical records cover sheet information |
|                                      |                                     | KTINHOS_OUTBRIEF        | Discharge summary records                         |

---

---

|                         |                                                            |                           |                                                                    |
|-------------------------|------------------------------------------------------------|---------------------------|--------------------------------------------------------------------|
|                         | Inpatient prescription database                            | KTINHOS_MEDICAL_ORDER     | Inpatient treatment records                                        |
|                         |                                                            | KTINHOS_DIAGNOSIS         | Inpatient diagnosis records                                        |
|                         |                                                            | KTINHOS_SURGERY           | Inpatient surgery records                                          |
|                         | Inpatient charge database                                  | KTINHOS_CHARGE            | Inpatient charge records                                           |
|                         |                                                            | KTINHOS_CHARGE_OUT        | Discharge bill records                                             |
|                         |                                                            | KTINHOS_CHARGE_OUT_DETAIL | Detailed discharge bill records                                    |
| Clinical outcome events | Cardiovascular diseases surveillance and management system | KTCDMS_CVA_CARD           | Detailed information on adults with cardiovascular disease records |
|                         |                                                            | KTCDMS_CVA_VISITS         | Follow-up records for adults with cardiovascular diseases          |
|                         |                                                            | KTCDMS_CVA_VISITS_DETAIL  | Detailed follow-up records for adults with cardiovascular diseases |
|                         |                                                            | KTCDMS_CVA_MEDIDETAIL     | Medication records for adults with cardiovascular diseases         |

---

---

|                              |                             |                                                    |
|------------------------------|-----------------------------|----------------------------------------------------|
| Cancer surveillance database | KTCDCMS_TUMOR_CARD          | Detailed information on adults with cancer records |
|                              | KTCDCMS_TUMOR_VISITS        | Follow-up records for adults with cancer           |
|                              | KTCDCMS_TUMOR_VISITS_DETAIL | Detailed follow-up records for adults with cancer  |
|                              | KTCDCMS_TUMOR_MEDIDETAILED  | Medication records for adults with cancer          |
| Database of death records    | KTHRA_DEATH_RECORD          | Death certificates                                 |

---
